# Supplementary material for: Maltol, a Natural Flavor Enhancer, Inhibits NLRP3 and Non-Canonical Inflammasome Activation
Source: Antioxidants (Basel). 2022 Sep 28;11(10):1923. doi: 10.3390/antiox11101923 (PMC9598623; doi:10.3390/antiox11101923)
Supplement: Supplementary file 1 [file antioxidants-11-01923-s001.zip › antioxidants-1927344-supplementary.pdf]

**Maltol, a natural flavor enhancer, inhibits NLRP3 and non-canonical inflammasome activation**

Huijeong Ahn<sup>1</sup>, Gilyoung Lee<sup>1</sup>, Byung-Cheol Han<sup>1,2</sup>, Seung-Ho Lee<sup>2</sup>, and Geun-Shik Lee<sup>1,\*</sup>

<sup>1</sup>College of Veterinary Medicine and Institute of Veterinary Science, Kangwon National University, Chuncheon, Republic of Korea.

<sup>2</sup>Korea Ginseng Research Institute, Korea Ginseng Corporation, Daejeon, Republic of Korea.

Running title: Anti-inflammasome effect of maltol

\*Correspondence: Geun-Shik Lee, DVM, Ph.D.

Lab. of Inflammatory Diseases, Department of Physiology, College of Veterinary Medicine, Kangwon National University, 1 kangwondaehak-gil, Chuncheon 24341, Republic of Korea.  
e-mail: leegeun@kangwon.ac.kr, Tel: +82-33-250-8683, Fax: +82-33-244-2367

## Supplementary Figure S1

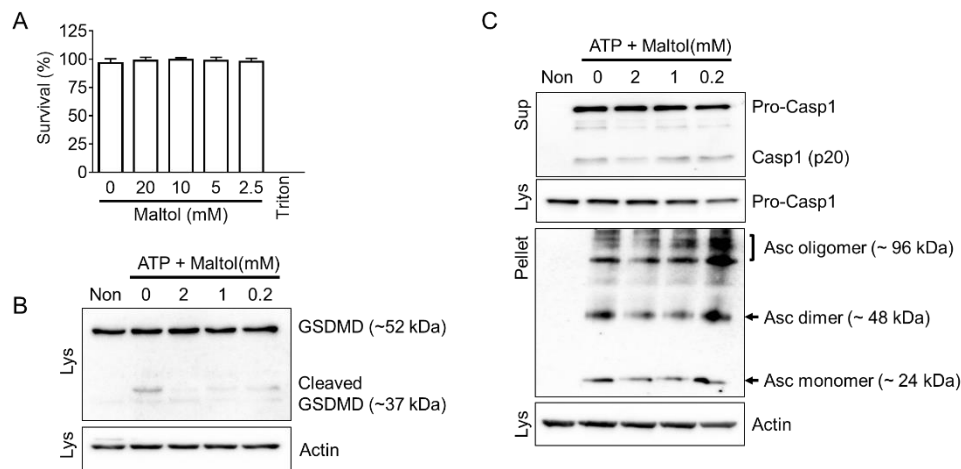

**A**, LPS-primed BMDMs were treated with maltol or Triton X-100 (0.01%, Triton), and the survival rate (cytotoxicity) was analyzed using an assay kit (EZ-Cytox, Dogen Bio, Seoul, Republic of Korea) according to the manufacture's method. The bar graph presents the mean  $\pm$  SD. **B**, LPS-primed BMDMs were treated with ATP and maltol as indicated, and the cleavage of GSDMD was observed using immunoblotting (anti-GSDMD antibody, ab209845, Abcam, Cambridge, MA, USA). **C**, LPS-primed BMDMs were treated with ATP and maltol. The lysate (Lys) was transferred into a new tube and collected by centrifugation at 15,000 rcf for 5 min. The remaining pellet was washed two times with PBS and then re-suspended and cross-linked with 2 mM suberic acid bis (Sigma-Aldrich Co.) for 1 h, followed by centrifugation at 15,000 rcf for 5 min. The cross-linked pellets (Pellet) were re-suspended in 50  $\mu$ L of 2 X loading dye buffer (116 mM Tris, 3.4 % SDS, 12 % glycerol, 200 mM DTT, 0.003 % bromo phenol blue) [Ref.1, 2]. The pellet was subjected to Western blot assay using anti-ASC antibody (sc-22514, Santa Cruz Biotechnology, Dallas, TX, USA).

Ref. 1. Lee, G.S.; Subramanian, N.; Kim, A.I.; Aksentijevich, I.; Goldbach-Mansky, R.; Sacks, D.B.; Germain, R.N.; Kastner, D.L.; Chae, J.J. The calcium-sensing receptor regulates the NLRP3 inflammasome through  $\text{Ca}^{2+}$  and cAMP. *Nature* 2012, 492, 123-127, doi:10.1038/nature11588.

Ref. 2. Fernandes-Alnemri, T.; Yu, J.W.; Juliana, C.; Solorzano, L.; Kang, S.; Wu, J.; Datta, P.; McCormick, M.; Huang, L.; McDermott, E.; et al. The AIM2 inflammasome is critical for innate immunity to *Francisella tularensis*. *Nature immunology* 2010, 11, 385-393, doi:10.1038/ni.1859.

## Supplementary Figure S2

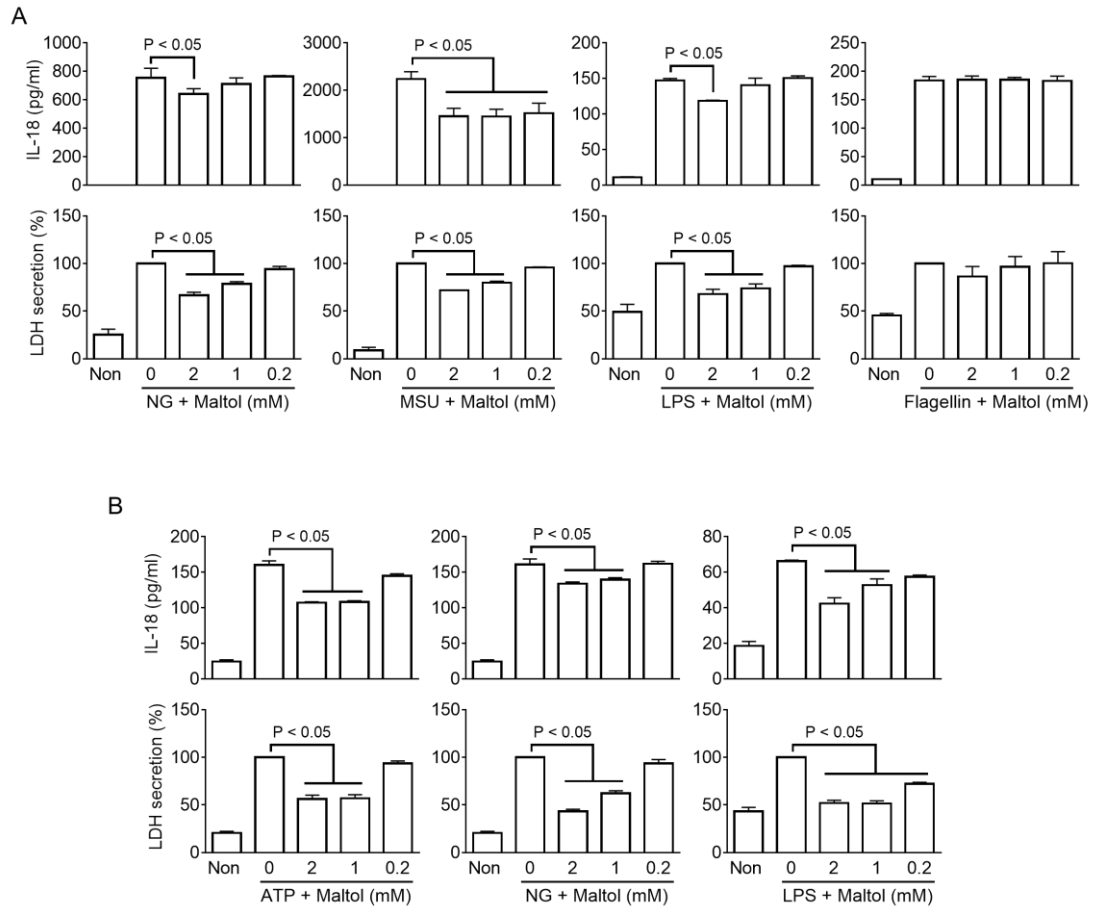

**A**, LPS-primed BMDMs were treated with the inflammasome trigger, and the secretion of IL-18 and LDH was measured. **B**, PMA-treated THP-1 cells were primed with LPS, and the inflammasomes were activated with the selective triggers. IL-18 and LDH releases were analyzed. The bar graph presents the mean  $\pm$  SD.

## Supplementary Figure S3

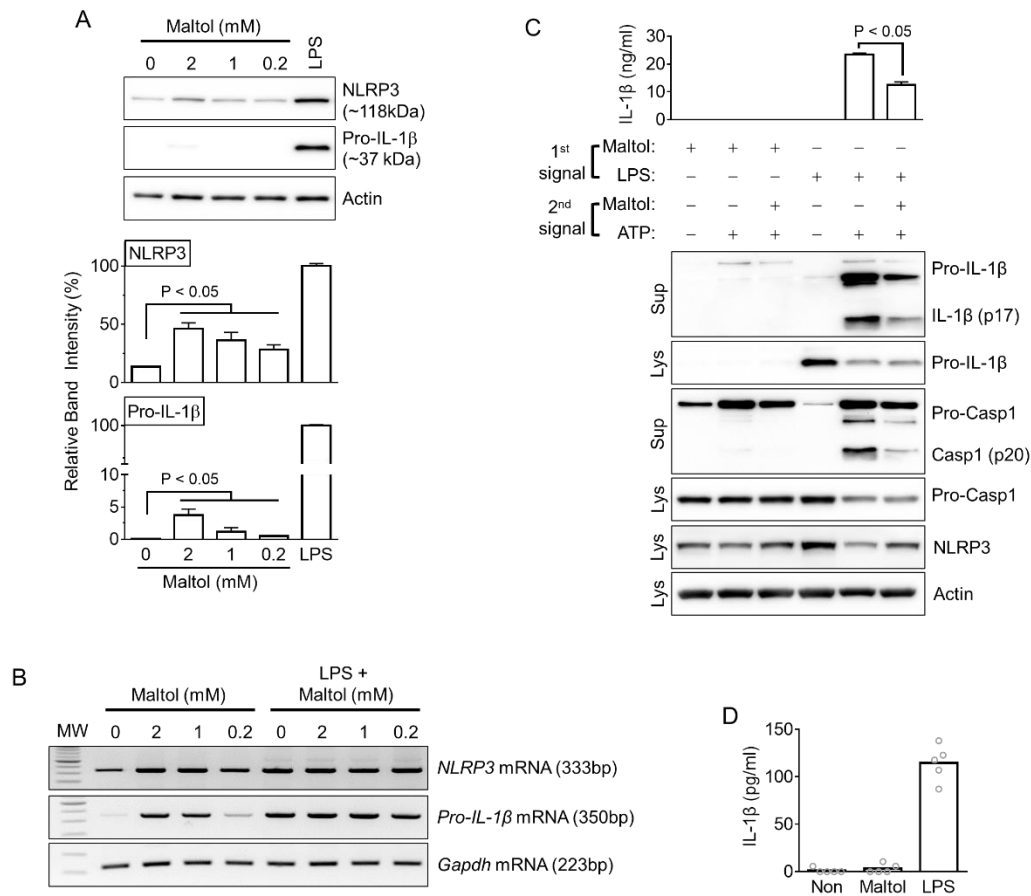

**A**, BMDMs were treated with maltol or LPS for 3 h, and the lysates were collected for analyzing the protein levels of NLRP3 and pro-IL-1 $\beta$  using immunoblotting. The band intensities of the images are plotted as bar graphs. **B**, BMDMs were treated with maltol only, or LPS and maltol as indicated. The transcripts of *NLRP3* and *pro-IL-1 $\beta$*  were analyzed using RT-PCR. The gene-specific primers are as follows: *NLRP3* (GeneBank ID, NM\_145827), 5'-CAG ACT GGC AAA AGG CTG TG-3', 5'-TCT TCC CGG TCT CCA TCT GT-3'; *pro-IL-1 $\beta$*  (NM\_008361), 5'-CAG GCA GGC AGT ATC ACT CA-3' and 5'-AGG CCA CAG GTA TTT TGT CG-3'; *Gapdh* (NM\_001289726, 223 bp), 5'-AAC TTT GGC ATT GTG GAA GG-3' and 5'-ACA CAT TGG GGG TAG GAA CA-3'. The images were obtained from agarose gel electrophoresis and ethidium bromide staining. **C**, BMDMs were primed with maltol or LPS during the priming step (1<sup>st</sup> signal) and subjected to maltol or ATP at the activation step (2<sup>nd</sup> signal), as indicated. The secretion of IL-1 $\beta$  and Casp1 and the expression of NLRP3 were

analyzed by ELISA and immunoblotting. **D**, Mice (n = 5 per group) were injected IP with PBS, maltol (2 mg/mouse), or LPS (100 µg/mouse). After 6h injection, the peritoneal IL-1 $\beta$  secretion was measured using ELISA. The bar graph presents the mean  $\pm$  SD.

## Supplementary Figure S4

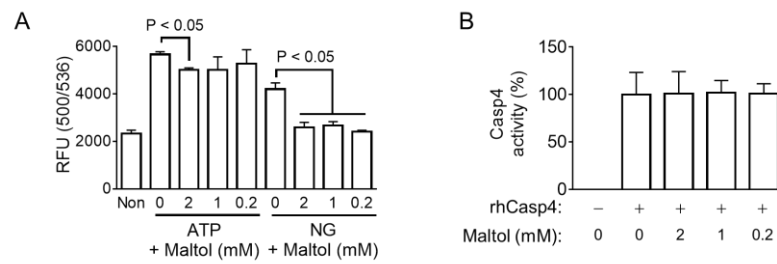

**A**, LPS-primed BMDMs were treated with DHR123 to measure ROS production in the presence of ATP or NG with/without Maltol. Relative fluorescence unit (RFU) as the level of ROS was measured. **B**, Recombinant human (rh) caspase 4 (Casp4) was incubated with maltol, and the Casp4 activity was analyzed using an assay kit. The bar graph presents the mean  $\pm$  SD.
